# Supplementary material for: Peptide Epitope Hot Spots of CD4 T Cell Recognition Within Influenza Hemagglutinin During the Primary Response to Infection
Source: MDPI journal article supplement (doi:10.3390/pathogens8040220), 2019-11-05
Supplement: s1 [file s1]

| Mouse Strain | MHC Haplotype    | Peptide | Amino Acids | Sequence                   | Spots per 10 <sup>6</sup> cells |
|--------------|------------------|---------|-------------|----------------------------|---------------------------------|
| A/J          | H-2 <sup>a</sup> | HA p21  | 120-136     | 120 EQLSSVSSFERFEIFPK 136  | 474                             |
|              |                  | HA p23  | 132-148     | 132 EIFPKESSWPNHTVTGV 148  | 72                              |
|              |                  | HA p30  | 174-190     | 174 YPNLSKSYVNNKEKEVL 190  | 374                             |
|              |                  | HA p33  | 192-208     | 192 LWGVHHPNIGNQRALY 208   | 90                              |
|              |                  | HA p37  | 215-231     | 215 VSVVSSHYSRRFTPEIA 231  | 236                             |
|              |                  | HA p43  | 250-266     | 250 LEPGDTIIFEANGNLIA 266  | 74                              |
|              |                  | HA p48  | 280-296     | 280 GIITSNAPMDECDACKCQ 296 | 81                              |
|              |                  | HA p52  | 304-320     | 304 SSLPFQNVHPVTIGECP 320  | 116                             |
|              |                  | HA p56  | 328-344     | 328 LRMVTGLRNIPSIQSRG 344  | 271                             |
|              |                  | HA p61  | 358-374     | 358 TGMVDGWYGYHHQNEQG 374  | 507                             |
|              |                  | HA p64  | 375-391     | 375 SGYAADQKSTQNAINGI 391  | 351                             |
|              |                  | HA p68  | 398-414     | 398 VIEKMNTQFTAVGKEFN 414  | 640                             |
|              |                  | HA p71  | 416-432     | 416 LERRMENLNKKVDDGFL 432  | 83                              |
|              |                  | HA p78  | 458-474     | 458 VKNLYEKVKSQLKNNAK 474  | 33                              |
|              |                  | HA p84  | 492-508     | 492 MESVKNGTYDYPKYSEE 508  | 99                              |
|              |                  | HA p90  | 527-543     | 527 YQILAIYSTVASSLVLL 543  | 0                               |
| B10.PL       | I-A <sup>u</sup> | HA p15  | 84-100      | 84 CELLISKESWSYIVETP 100   | 51                              |
|              |                  | HA p25  | 144-160     | 144 TVTGVSASCSHNGKSSF 160  | 124                             |
|              |                  | HA p54  | 316-332     | 316 IGECPKYVRSACLRMVT 332  | 369                             |
|              |                  | HA p55  | 322-338     | 322 YVRSACLRMVTGLRNIP 338  | 289                             |
|              |                  | HA p65  | 380-396     | 380 DQKSTQNAINGITNKVN 396  | 62                              |
|              |                  | HA p79  | 464-479     | 464 KVKSQKNNAKEIGNG 479    | 105                             |
| C57BL/10     | H-2 <sup>b</sup> | HA p16  | 90-106      | 90 KESWSYIVETPNPENG 106    | 100                             |
|              |                  | HA p35  | 203-219     | 203 NQRALYHTENAYVSVVS 219  | 119                             |
|              |                  | HA p52  | 304-320     | 304 SSLPFQNVHPVTIGECP 320  | 93                              |
| HLA-DQ8      | DQ8              | HA p14  | 78-94       | 78 ILGNPECELLISKESWS 94    | 136                             |
|              |                  | HA p18  | 102-118     | 102 PENGTCYPGYFADYEEL 118  | 69                              |
|              |                  | HA p21  | 120-136     | 120 EQLSSVSSFERFEIFPK 136  | 62                              |
|              |                  | HA p47  | 274-290     | 274 SRGFGSGIITSNAPMDE 290  | 96                              |
|              |                  | HA p48  | 280-296     | 280 GIITSNAPMDECDACKCQ 296 | 155                             |
|              |                  | HA p68  | 398-414     | 398 VIEKMNTQFTAVGKEFN 414  | 114                             |
|              |                  | HA p77  | 452-468     | 452 DFHDSNVKNLYEKVKSQ 468  | 59                              |
| HLA-DR1      | DR1              | HA p8   | 43-58       | 43 VTHSVNLLED SHNGKL 58    | 45                              |
|              |                  | HA p22  | 126-142     | 126 SSFERFEIFPKESSWP 142   | 101                             |
|              |                  | HA p23  | 132-148     | 132 EIFPKESSWPNHTVTGV 148  | 62                              |
|              |                  | HA p27  | 156-172     | 156 GKSSFYRNLLWLTGKNG 172  | 167                             |
|              |                  | HA p28  | 162-178     | 162 RNLLWLTGKNGLYPNLS 178  | 163                             |
|              |                  | HA p33  | 192-208     | 192 LWGVHHPNIGNQRALY 208   | 39                              |

|         |                  |        |         |                            |     |
|---------|------------------|--------|---------|----------------------------|-----|
|         |                  | HA p35 | 203-219 | 203 NQRALYHTENAYVSVVS 219  | 159 |
|         |                  | HA p43 | 250-266 | 250 LEPGDTIIFEANGNLIA 266  | 111 |
|         |                  | HA p44 | 256-272 | 256 IIFEANGNLIAPWYAFA 272  | 46  |
|         |                  | HA p45 | 262-278 | 262 GNLIAPWYAFALSRGFG 278  | 86  |
|         |                  | HA p64 | 375-391 | 375 SGYAADQKSTQNAINGI 391  | 118 |
|         |                  | HA p67 | 392-408 | 392 TNKVNSVIEKMNTQFTA 408  | 90  |
|         |                  | HA p68 | 398-414 | 398 VIEKMNTQFTAVGKEFN 414  | 75  |
|         |                  | HA p74 | 434-450 | 434 IWTYNAELLVLENERT 450   | 128 |
|         |                  | HA p75 | 440-456 | 440 ELLVLENERTLDFHDS 456   | 146 |
|         |                  | HA p89 | 522-538 | 522 ESMGVYQILAIYSTVAS 538  | 44  |
| HLA-DR4 | DR4              | HA p35 | 203-219 | 203 NQRALYHTENAYVSVVS 219  | 51  |
|         |                  | HA p56 | 328-344 | 328 LRMVTGLRNIPSIQSRG 344  | 52  |
|         |                  | HA p65 | 380-396 | 380 DQKSTQNAINGITNKVN 396  | 39  |
|         |                  | HA p79 | 464-479 | 464 KVKSQKNNAKEIGNG 479    | 36  |
|         |                  | HA p94 | 550-565 | 550 SFWMCSNGSLQCRICI 565   | 35  |
| BALB/c  | H-2 <sup>d</sup> | HA p12 | 66-82   | 66 PLQLGNCSVAGWILGNP 82    | 105 |
|         |                  | HA p21 | 120-136 | 120 EQLSSVSSFERFEIFPK 136  | 146 |
|         |                  | HA p22 | 126-142 | 126 SSFERFEIFKESSWPN 142   | 151 |
|         |                  | HA p37 | 215-231 | 215 VSVVSSHYSRRFTPEIA 231  | 130 |
|         |                  | HA p56 | 328-344 | 328 LRMVTGLRNIPSIQSRG 344  | 112 |
|         |                  | HA p66 | 386-402 | 386 NAINGITNKVNSVIEKM 402  | 124 |
| SJL     | H-2 <sup>s</sup> | HA p21 | 120-136 | 120 EQLSSVSSFERFEIFPK 136  | 306 |
|         |                  | HA p22 | 126-142 | 126 SSFERFEIFKESSWPN 142   | 663 |
|         |                  | HA p23 | 132-148 | 132 EIFPKESSWPNHTVTGV 148  | 300 |
|         |                  | HA p24 | 138-154 | 138 SSWPNHTVTGVSASCSH 154  | 91  |
|         |                  | HA p25 | 144-160 | 144 TVTGVSASCSHNGKSSF 160  | 426 |
|         |                  | HA p28 | 162-178 | 162 RNLLWLTGKNGLYPNLS 178  | 263 |
|         |                  | HA p38 | 221-237 | 221 HYSRRFTPEIAKRPKVR 237  | 84  |
|         |                  | HA p53 | 310-326 | 310 NVHPVTIGECPKYVRS 326   | 123 |
|         |                  | HA p54 | 316-332 | 316 IGECPKYVRS AKLRMVT 332 | 191 |
|         |                  | HA p55 | 322-338 | 322 YVRS AKLRMVTGLRNIP 338 | 93  |
|         |                  | HA p57 | 334-350 | 334 LRNIPSIQSRGLFGAIA 350  | 243 |
|         |                  | HA p65 | 380-396 | 380 DQKSTQNAINGITNKVN 396  | 61  |
|         |                  | HA p66 | 386-402 | 386 NAINGITNKVNSVIEKM 402  | 428 |

**Supplemental Table 2:** Each mouse strain including those without epitopes >125 spots/million CD4 T cells. Those peptides in red are those included in Table 1, with the bold corresponding to those with ≥300 spots/million.
