# Supplementary material for: Peptide Epitope Hot Spots of CD4 T Cell Recognition Within Influenza Hemagglutinin During the Primary Response to Infection
Source: MDPI journal article supplement (doi:10.3390/pathogens8040220), 2019-11-05
Supplement: s1 [file s1]

| Peptide Number | Amino Acids | Peptide Sequence           |
|----------------|-------------|----------------------------|
| p1             | 1-17        | 1-MKAKLLVLLCTFTATYA-17     |
| p2             | 7-23        | 7-VLLCTFTATYADTICIG-23     |
| p3             | 13-29       | 13-TATYADTICIGYHANN-29     |
| p4             | 19-35       | 19-TICIGYHANNSTDVDT-35     |
| p5             | 25-41       | 25-HANNSTDVDTVLEKNV-41     |
| p6             | 31-47       | 31-DTVDTVLEKNVTVTHSV-47    |
| p7             | 37-53       | 37-LEKNVTVTHSVNLLDS-53     |
| p8             | 43-58       | 43-VTHSVNLLDSHNGKL-58      |
| p9             | 48-64       | 48-NLLDSHNGKLCLLKGI-64     |
| p10            | 54-70       | 54-HNGKLCLLKGIAPQLG-70     |
| p11            | 60-76       | 60-LLKGIAPQLGNCVAG-76      |
| p12            | 66-82       | 66-PLQLGNCVAGWILGNP-82     |
| p13            | 72-88       | 72-CSVAGWILGNPECELLI-88    |
| p14            | 78-94       | 78-ILGNPECELLISKESWS-94    |
| p15            | 84-100      | 84-CELLISKESWSYIVETP-100   |
| p16            | 90-106      | 90-KESWSYIVETPNPENG-106    |
| p17            | 96-112      | 96-IVETPNPENGTCPGYF-112    |
| p18            | 102-118     | 102-PENGTCPGYFADYEEL-118   |
| p19            | 108-124     | 108-YPGYFADYEELREQL-124    |
| p20            | 114-130     | 114-DYEELREGLSSVSSFER-130  |
| p21            | 120-136     | 120-EQLSSVSSFERFEIFPK-136  |
| p22            | 126-142     | 126-SSFERFEIFPKESSWPN-142  |
| p23            | 132-148     | 132-EIFPKESSWPNHTVTGV-148  |
| p24            | 138-154     | 138-SSWPNHTVTGVSASCSH-154  |
| p25            | 144-160     | 144-TVTGVSASCSHNGKSSF-160  |
| p26            | 150-166     | 150-ASCSHNGKSSFYRNLLW-166  |
| p27            | 156-172     | 156-GKSSFYRNLLWLTGKNG-172  |
| p28            | 162-178     | 162-RNLLWLTGKNGLYPNLS-178  |
| p29            | 168-184     | 168-TGKNGLYPNLSKSYVNN-184  |
| p30            | 174-190     | 174-YPNLSKSYVNNKEKEVL-190  |
| p31            | 180-196     | 180-SYVNNKEKEVLVLWGVH-196  |
| p32            | 186-202     | 186-EKEVLVLWGVHHPNIG-202   |
| p33            | 192-208     | 192-LWGVHHPNIGNQRALY-208   |
| p34            | 198-214     | 198-PPNIGNQRALYHTENAY-214  |
| p35            | 203-219     | 203-NQRALYHTENAYVSVVS-219  |
| p36            | 209-225     | 209-HTENAYVSVVSSHYSRR-225  |
| p37            | 215-231     | 215-VSVVSSHYSRRFTPEIA-231  |
| p38            | 221-237     | 221-HYSSRRFTPEIAKRPKVR-237 |
| p39            | 227-243     | 227-TPEIAKRPKVRDQEGRI-243  |
| p40            | 233-249     | 233-RPKVRDQEGRINYWTL-249   |
| p41            | 238-254     | 238-DQEGRINYWTLLEPGD-254   |
| p42            | 244-260     | 244-NYYWTLLEPGDTIIFEA-260  |
| p43            | 250-266     | 250-LEPGDTIIFEANGNLIA-266  |
| p44            | 256-272     | 256-IIFEANGNLIAPWYAFA-272  |
| p45            | 262-278     | 262-GNLIAPWYAFALSRGFG-278  |
| p46            | 268-284     | 268-WYAFALSRGFGSGIITS-284  |
| p47            | 274-290     | 274-SRGFGSGIITSNAPMDE-290  |
| p48            | 280-296     | 280-GIITSNAPMDECDAKCQ-296  |
| p49            | 286-302     | 286-APMDECDAKCQTPQGAI-302  |
| p50            | 292-308     | 292-DAKCQTPQGAINSSLPF-308  |

|     |         |                            |
|-----|---------|----------------------------|
| p51 | 298-314 | 298-PQGAINSSLPFQNVHPV-314  |
| p52 | 304-320 | 304-SSLPFQNVHPVTIGEC-320   |
| p53 | 310-326 | 310-NVHPVTIGECPKYVRS-326   |
| p54 | 316-332 | 316-IGECPKYVRS AKLRMT-332  |
| p55 | 322-338 | 322-YVRS AKLRMTGLRNIP-338  |
| p56 | 328-344 | 328-LRMTGLRNIPSIQSRG-344   |
| p57 | 334-350 | 334-LRNIPSIQSRGLFGAIA-350  |
| p58 | 340-356 | 340-IQSRGLFGAIA GFIEGG-356 |
| p59 | 346-362 | 346-FGAIA GFIEGGWTGMVD-362 |
| p60 | 352-368 | 352-FIEGGWTGMVDGWYGYH-368  |
| p61 | 358-374 | 358-TGMVDGWYGYHHQNEQG-374  |
| p62 | 364-380 | 364-WYGYHHQNEQSGYAAD-380   |
| p63 | 369-385 | 369-HQNEQSGYAADQKSTQ-385   |
| p64 | 375-391 | 375-SGYAADQKSTQNAINGI-391  |
| p65 | 380-396 | 380-DQKSTQNAINGITNKVN-396  |
| p66 | 386-402 | 386-NAINGITNKVNSVIEKM-402  |
| p67 | 392-408 | 392-TNKVNSVIEKMNTQFTA-408  |
| p68 | 398-414 | 398-VIEKMNTQFTAVGKEFN-414  |
| p69 | 404-420 | 404-TQFTAVGKEFNKLERRM-420  |
| p70 | 410-426 | 410-GKEFNKLERRMENLNKK-426  |
| p71 | 416-432 | 416-LERRMENLNKKVDDGFL-432  |
| p72 | 422-438 | 422-NLNKKVDDGFLDIWTYN-438  |
| p73 | 428-444 | 428-DDGFLDIWTYNAELLVL-444  |
| p74 | 434-450 | 434-IWTYNAELLVLENERT-450   |
| p75 | 440-456 | 440-ELLVLENERTLDFHDS-456   |
| p76 | 446-462 | 446-ENERTLDFHDSNVKNLY-462  |
| p77 | 452-468 | 452-DFHDSNVKNLYEKVKSQ-468  |
| p78 | 458-474 | 458-VKNLYEKVKSQ LKNNAK-474 |
| p79 | 464-479 | 464-KVKSQ LKNNAKEIGNG-479  |
| p80 | 469-485 | 469-LKNNAKEIGNGCFEFYH-485  |
| p81 | 475-490 | 475-EIGNGCFEFYHKCNNE-490   |
| p82 | 480-496 | 480-CFEFYHKCNNECMESVK-496  |
| p83 | 486-502 | 486-KCNNECMESVKNGTYDY-502  |
| p84 | 492-508 | 492-MESVKNGTYDYPKYSEE-508  |
| p85 | 498-514 | 498-GTYDYPKYSEESKLNRE-514  |
| p86 | 504-520 | 504-KYSEESKLNREKIDGVK-520  |
| p87 | 510-526 | 510-KLNREKIDGVKLESMGV-526  |
| p88 | 516-532 | 516-IDGVKLESMGVYGLAI-532   |
| p89 | 522-538 | 522-ESMGVYQILAIYSTVAS-538  |
| p90 | 527-543 | 527-YQILAIYSTVASSLVLL-543  |
| p91 | 533-549 | 533-YSTVASSLVLLVSLGAI-549  |
| p92 | 539-555 | 539-SLVLLVSLGAISFWMCS-555  |
| p93 | 545-560 | 545-SLGAISFWMCSNGSLQ-560   |
| p94 | 550-565 | 550-SFWMCSNGSLQCRICI-565   |

**Supplemental Table 1:** Peptides from H1N1 A/New Caledonia/20/99 and their corresponding amino acid sequence obtained from BEI.
